# Supplementary material for: Benthic Biodiversity, Carbon Storage and the Potential for Increasing Negative Feedbacks on Climate Change in Shallow Waters of the Antarctic Peninsula
Source: MDPI journal article supplement (doi:10.3390/biology11020320), 2022-02-17
Supplement: s1 [file s1]

## Supplementary Material

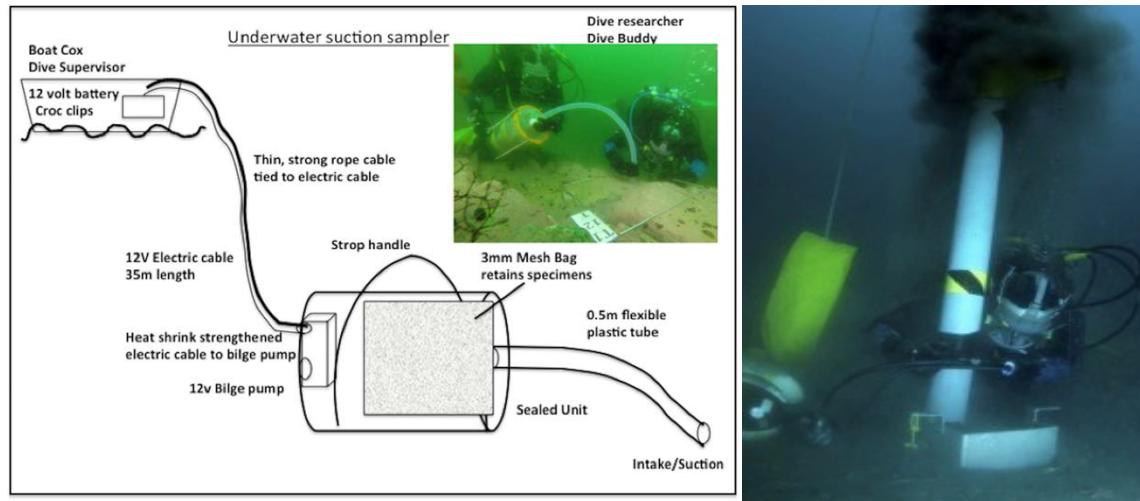

Fig. S1 Design of the battery operated suction sampler for rocky substrata (left panel; Souster, 2017) and the airlift suction sampler for soft substrata (right panel; Vause et al., 2019).

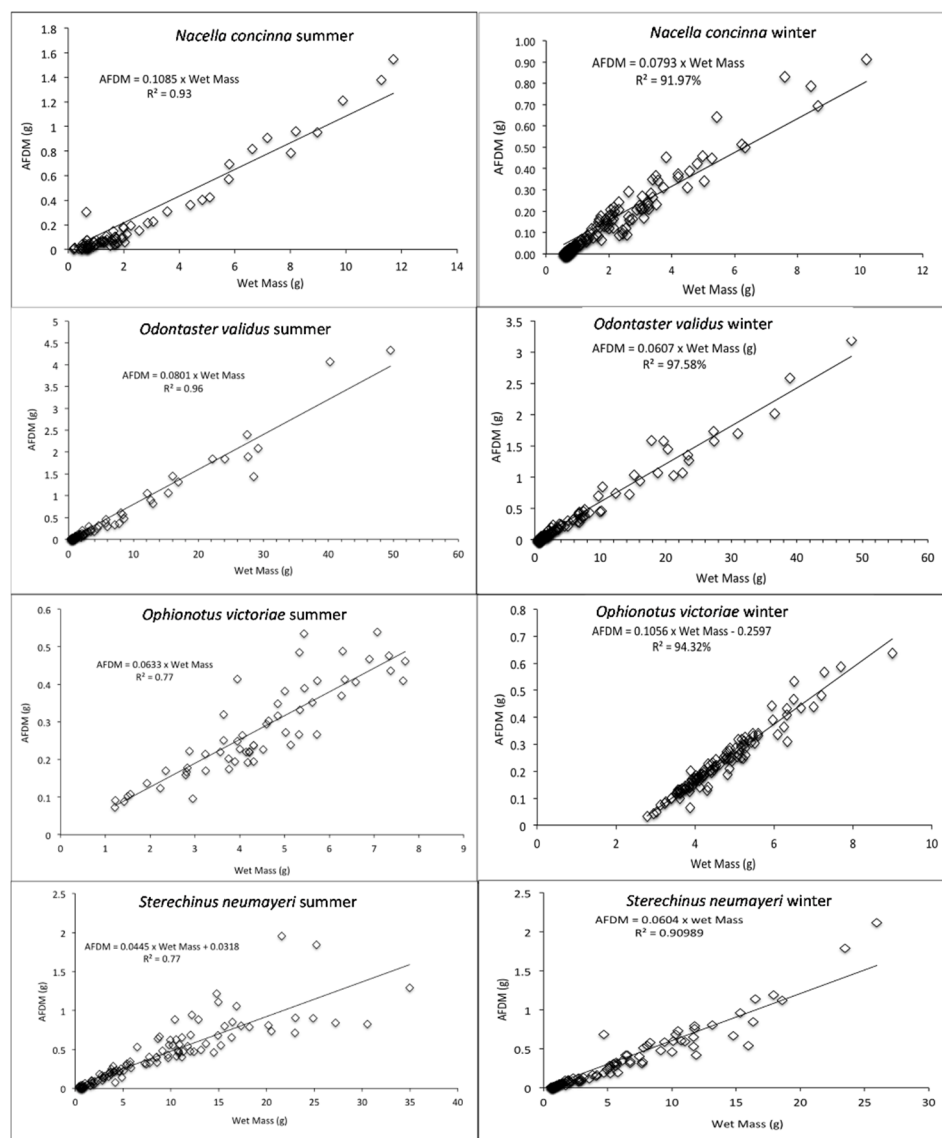

Fig S2. Morphometric relationships for hard substrata species that were used for mass conversions of individuals that were not weighed.

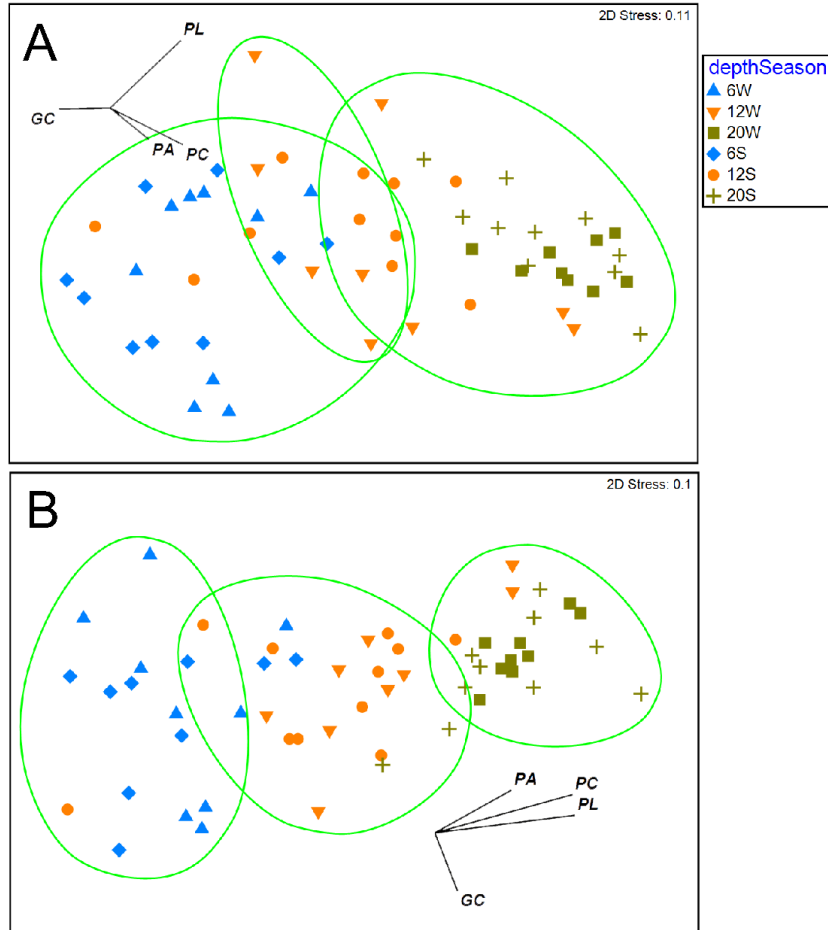

**Fig S3.** The similarity of carbon standing stock within the rocky shore functional groups around Rothera Point Antarctica, at 6, 12 and 20m in winter (W) and summer (S). A) organic (tissue) carbon  $\text{m}^{-2}$ , B) skeletal carbon, per  $\text{m}^{-2}$ . Groupings indicate similarity of A) 60% and B) 69%. All species were categorised into feeding guilds (see table), and in both cases the functional groupings driving the separation were GC (grazers), PL (mobile hard shelled scavenger/predator), PC (sessile hard shelled scavenger/predator) and PA (scavenger/predator arthropod).

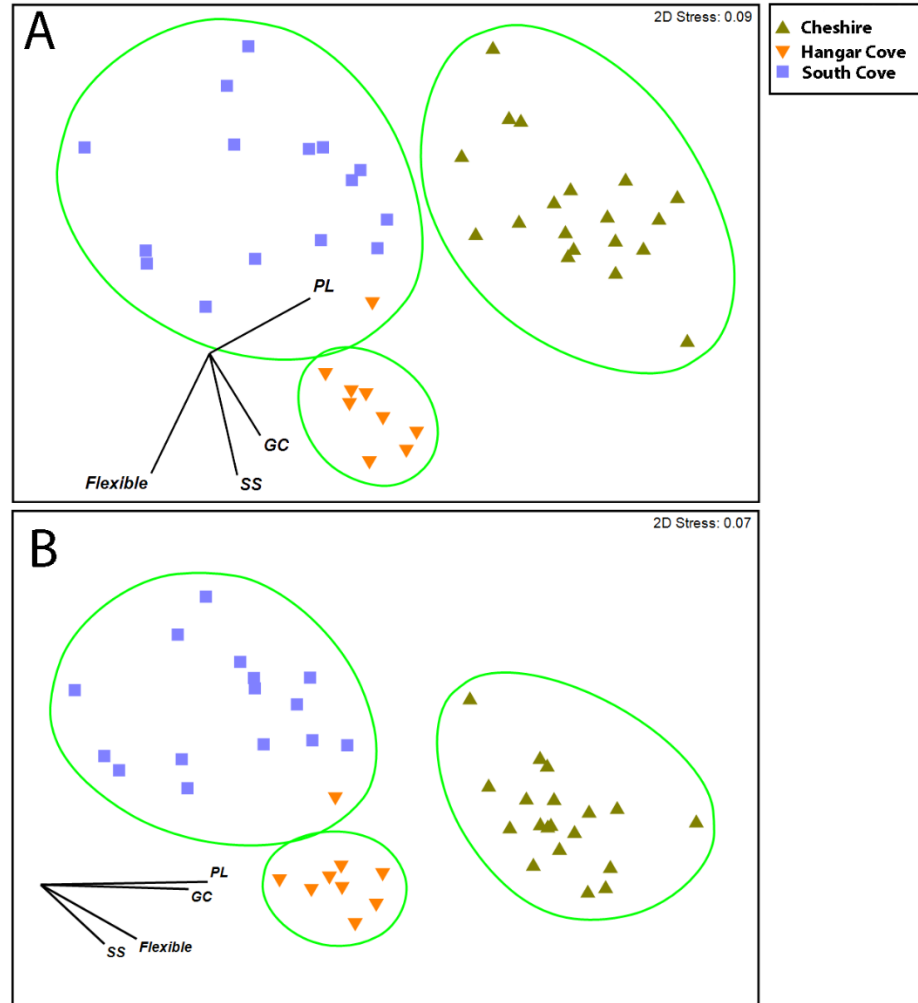

**Figure S4.** Comparison of carbon standing stock in A) organic tissues, m<sup>-2</sup> and B) in skeletal tissues, m<sup>-2</sup>, in both rocky (Cheshire) and soft (Hangar and South Cove) substratum functional groups sampled from 20m depth. Groupings indicate similarities of A) 63% and B) 68%. All species were categorised into feeding guilds (see table 1) and in both cases the functional groupings driving the separation were GC (grazers), PL (mobile hard shelled scavenger/predator), SS (sedentary suspension feeders) and dietary flexible species.

Table S1. Morphometric relationships for soft substrata species that were used for mass conversions of individuals that were not weighed. Location (Cove), Year and Season were included for species when they were significant factors in a PERMONOVA analysis. AFDM =ash free dry mass (g), AM = ash mass (g), L = length (mm)

| Species                      | Cove   | Year | Season | Equation                   |
|------------------------------|--------|------|--------|----------------------------|
| length to AFDM relationships |        |      |        |                            |
| <i>Aequiyoldia eightsii</i>  | Hangar | 2013 | summer | $-0.00524 + 0.000017 L^3$  |
| <i>Aequiyoldia eightsii</i>  | South  | 2013 | summer | $-0.0072 + 0.000019 L^3$   |
| <i>Aequiyoldia eightsii</i>  | Hangar | 2014 | summer | $-0.001796 + 0.000017 L^3$ |
| <i>Aequiyoldia eightsii</i>  | South  | 2014 | summer | $-0.00766 + 0.000019 L^3$  |
| <i>Aequiyoldia eightsii</i>  | Hangar | 2014 | winter | $-0.002061 + 0.000015 L^3$ |
| <i>Aequiyoldia eightsii</i>  | South  | 2014 | winter | $-0.0005 + 0.000017 L^3$   |
| <i>Aequiyoldia eightsii</i>  | Hangar | 2015 | summer | $-0.002352 + 0.000019 L^3$ |
| <i>Aequiyoldia eightsii</i>  | South  | 2015 | summer | $-0.00506 + 0.000019 L^3$  |
| <i>Laternula elliptica</i>   | Hangar | 2013 | summer | $-0.066 + 0.000023 L^3$    |
| <i>Laternula elliptica</i>   | Hangar | 2014 | summer | $0.2092 + 0.000023 L^3$    |
| <i>Laternula elliptica</i>   | South  | 2014 | summer | $0.0049 + 0.000025 L^3$    |
| <i>Laternula elliptica</i>   | Hangar | 2014 | winter | $0.182 + 0.000026 L^3$     |
| <i>Laternula elliptica</i>   | South  | 2014 | winter | $-0.01609 + 0.000029 L^3$  |
| <i>Laternula elliptica</i>   | Hangar | 2015 | summer | $-0.233 + 0.000028 L^3$    |
| <i>Laternula elliptica</i>   | South  | 2015 | summer | $-0.01073 + 0.000022 L^3$  |
| <i>Nacella concinna</i>      |        | 2014 |        | $-0.00208 + 0.000014 L^3$  |
| <i>Nacella concinna</i>      |        | 2015 |        | $0.0051 + 0.000014 L^3$    |
| <i>Ophionotus victoriae</i>  | South  | 2013 | summer | $0.03081 + 0.000031 L^3$   |
| <i>Ophionotus victoriae</i>  | Hangar | 2014 | summer | $0.1912 + 0.000027 L^3$    |
| <i>Ophionotus victoriae</i>  | South  | 2014 | summer | $0.02628 + 0.000034 L^3$   |
| <i>Ophionotus victoriae</i>  | Hangar | 2014 | winter | $-0.050 + 0.000042 L^3$    |
| <i>Ophionotus victoriae</i>  | South  | 2014 | winter | $0.02740 + 0.000031 L^3$   |

|                              |        |      |        |                          |
|------------------------------|--------|------|--------|--------------------------|
| <i>Ophionotus victoriae</i>  | Hangar | 2015 | summer | $0.189 + 0.000045 L^3$   |
| <i>Ophionotus victoriae</i>  | South  | 2015 | summer | $-0.0843 + 0.000076 L^3$ |
| <i>Sterechinus neumayeri</i> | Hangar | 2013 |        | $0.0306 + 0.000024 L^3$  |
| <i>Sterechinus neumayeri</i> | South  | 2013 |        | $0.0060 + 0.000018 L^3$  |
| <i>Sterechinus neumayeri</i> | Hangar | 2014 |        | $-0.0326 + 0.000036 L^3$ |
| <i>Sterechinus neumayeri</i> | South  | 2014 |        | $0.0517 + 0.000029 L^3$  |
| <i>Sterechinus neumayeri</i> | Hangar | 2015 |        | $0.0214 + 0.000037 L^3$  |
| <i>Sterechinus neumayeri</i> | South  | 2015 |        | $0.0468 + 0.000025 L^3$  |
| Length to DM relationships   |        |      |        |                          |
| <i>Laternula elliptica</i>   | Hangar | 2013 |        | $0.000048 L^3$           |
| <i>Laternula elliptica</i>   | Hangar | 2014 |        | $0.000065 L^3$           |
| <i>Laternula elliptica</i>   | South  | 2014 |        | $0.000061 L^3$           |
| <i>Laternula elliptica</i>   | Hangar | 2015 |        | $0.000067 L^3$           |
| <i>Laternula elliptica</i>   | South  | 2015 |        | $0.000058 L^3$           |
| DM to AFDM relationships     |        |      |        |                          |
| <i>Aequiyoldia eightsii</i>  | Hangar | 2013 | summer | 0.25433 DM               |
| <i>Aequiyoldia eightsii</i>  | South  | 2013 | summer | 0.27228 DM               |
| <i>Aequiyoldia eightsii</i>  | Hangar | 2014 | summer | 0.26226 DM               |
| <i>Aequiyoldia eightsii</i>  | South  | 2014 | summer | 0.28821 DM               |
| <i>Aequiyoldia eightsii</i>  | Hangar | 2014 | winter | 0.23809 DM               |
| <i>Aequiyoldia eightsii</i>  | South  | 2014 | winter | 0.25601 DM               |
| <i>Aequiyoldia eightsii</i>  | Hangar | 2015 | summer | 0.28619 DM               |
| <i>Aequiyoldia eightsii</i>  | South  | 2015 | summer | 0.26350 DM               |
| <i>Laternula elliptica</i>   | Hangar | 2013 | summer | $-0.182 + 0.5253 DM$     |

|                              |        |      |        |                        |
|------------------------------|--------|------|--------|------------------------|
| <i>Laternula elliptica</i>   | Hangar | 2014 | summer | 0.4157 + 0.33440 DM    |
| <i>Laternula elliptica</i>   | South  | 2014 | summer | -0.0055 + 0.4629 DM    |
| <i>Laternula elliptica</i>   | Hangar | 2014 | winter | -0.0431 + 0.38972 DM   |
| <i>Laternula elliptica</i>   | South  | 2014 | winter | -0.004510 + 0.35195 DM |
| <i>Laternula elliptica</i>   | Hangar | 2015 | summer | -0.3343 + 0.43525 DM   |
| <i>Laternula elliptica</i>   | South  | 2015 | summer | -0.00182 + 0.36700 DM  |
| <i>Nacella concinna</i>      |        | 2014 |        | 0.6577 DM              |
| <i>Nacella concinna</i>      |        | 2015 |        | 0.6355 DM              |
| <i>Sterechinus neumayeri</i> | Hangar | 2013 | summer | 0.2915 DM              |
| <i>Sterechinus neumayeri</i> | South  | 2013 | summer | 0.22255 DM             |
| <i>Sterechinus neumayeri</i> | South  | 2014 | summer | 0.35353 DM             |
| <i>Sterechinus neumayeri</i> | Hangar | 2014 |        | 0.37113 DM             |
| <i>Sterechinus neumayeri</i> | Hangar | 2015 | summer | 0.36060 DM             |
| <i>Sterechinus neumayeri</i> | South  | 2015 | summer | 0.31003 DM             |
| <i>Ophionotus victoriae</i>  | Hangar | 2013 | summer | 0.2919 DM              |
| <i>Ophionotus victoriae</i>  | South  | 2013 | summer | 0.29235 DM             |
| <i>Ophionotus victoriae</i>  | South  | 2014 | winter | 0.29235 DM             |
| <i>Ophionotus victoriae</i>  | Hangar | 2014 | winter | 0.3487 DM              |
| <i>Ophionotus victoriae</i>  | Hangar | 2014 | summer | 0.32858 DM             |
| <i>Ophionotus victoriae</i>  | South  | 2014 | summer | 0.28832 DM             |
| <i>Ophionotus victoriae</i>  | Hangar | 2015 | summer | 0.4381 DM              |
| <i>Ophionotus victoriae</i>  | South  | 2015 | summer | 0.3786 DM              |

Table S2. Dive site information collated from Antarctic SCUBA diving practitioners.

| Location Name                                                 | LAT(DD)      | LONG(DD)     | Substratum | Topography                           | Comments                                  |
|---------------------------------------------------------------|--------------|--------------|------------|--------------------------------------|-------------------------------------------|
| Dumbbell Island in the Terra Firma Islands                    | -68.69208    | -67.52688    | hard       | Hard Rock Community                  | American Gould Trip 2019                  |
| Stonington Island                                             | -68.18333    | -67.00000    | hard       | rocky                                | Lisa Trotter Dive Guide                   |
| Randall Rocks off Millerand Island                            | -68.17577    | -67.26823    | hard       | Hard Rock Community                  | American Gould Trip 2019                  |
| Troval                                                        | -67.77888889 | -68.42111111 | hard       | hard                                 | Carlos Angulo, Spain                      |
| Carvahal                                                      | -67.766525   | -68.8962     | hard       |                                      | Silvia Murcia, Inach                      |
| Mikkelsen Island                                              | -67.63333333 | -68.18333333 | hard       | hard bottom                          | Ricardo Sahade Sedna sail ship dive sites |
| Small island between Pourquoui Pas and Blaiklock Islands      | -67.55667    | -67.24722    | hard       | Hard Rock Community                  | American Gould Trip 2019                  |
| Small island off a small island to the north of Pinero Island | -67.54882    | -67.77137    | hard       | Hard Rock Community                  | American Gould Trip 2019                  |
| Tutton Point on Laird Island                                  | -66.87732    | -67.57520    | hard       | Hard Rock Community                  | American Gould Trip 2019                  |
| Detaille Island                                               | -66.86819167 | -66.79431111 | hard       | Ice Scoured Rocky Shelves            | Lisa Kelly IAATO                          |
| Detaille Island                                               | -66.86739722 | -66.78811667 | hard       | Rocky wall, Ice Scoured for top 20 m | Lisa Kelly IAATO                          |
| Detaille Island                                               | -66.86667    | -66.50000    | hard       | rocky                                | Lisa Trotter Dive Guide                   |
| Southern Saffery Islands                                      | -66.08942    | -65.83855    | hard       | Hard Rock Community                  | American Gould Trip 2019                  |
| Fish Island                                                   | -66.03333333 | -65.41666667 | hard       | hard bottom                          | Ricardo Sahade Sedna sail ship dive sites |
| Minnow Islands (part of Fish Islands South of Prospect Point) | -66.02505    | -65.35333    | hard       | Hard Rock Community                  | American Gould Trip 2019                  |
| Prospect Point                                                | -66.01667    | -65.35000    | hard       | rocky                                | Lisa Trotter Dive Guide                   |

|                                                                          |                  |                  |       |                                                      |                                                                                       |
|--------------------------------------------------------------------------|------------------|------------------|-------|------------------------------------------------------|---------------------------------------------------------------------------------------|
| Cuerville Island                                                         | -66.00440        | -65.36052        | mixed | gravel                                               | Ashley Knight and Peter Webster Nat Geo                                               |
| Small island south of Markham Island                                     | -65.94492        | -66.02482        | hard  | Hard Rock Community                                  | American Gould Trip 2019                                                              |
| Renaud Island                                                            | -<br>65.88222222 | -<br>66.09361111 | hard  | hard bottom                                          | Ricardo Sahade Sedna sail ship dive sites                                             |
| Berthelot Islands, Grandidier Channel                                    | -65.52528        | -64.20639        | hard  | rocky and gravelly bottom                            | Beligica 120 Expedition 2019                                                          |
| Small island to the north of Lahille Island and south of Lippmann Island | -65.51312        | -64.42027        | hard  | Hard Rock Community                                  | American Gould Trip 2019                                                              |
| Galindez Island                                                          | -65.24689        | -64.24413        | hard  | Boulder Shores                                       | Dkab sites from Barnes Arnold 2001 paper and I extracted coordinated from google maps |
| Vernadsky, Wall near channel entrance                                    | -65.24610        | -64.22780        | hard  | rocky reef                                           | Ashley Knight and Peter Webster Nat Geo                                               |
| Vernadsky, Argentine Islands, Corner Island                              | -65.24498        | -64.24123        | hard  | rocky reef                                           | Ashley Knight and Peter Webster Nat Geo                                               |
| Vernadsky                                                                | -65.24446        | -64.24258        | soft  | short rock wall down to soft bottom                  | Gail Ashton Peninsula Dives                                                           |
| Argentine Islands near Vernadsky                                         | -65.24018        | -64.23087        | hard  | Hard Rock Community                                  | American Gould Trip 2019                                                              |
| Petermann Island                                                         | -65.16667        | -64.16667        | hard  | rocky                                                | Lisa Trotter Dive Guide                                                               |
| Petermann Island                                                         | -<br>65.14453333 | -<br>64.09897778 | hard  | Rocky Shelves mainly scoured top 20 m                | Lisa Kelly IAATO                                                                      |
| Hovgaard Islands                                                         | -65.11583        | -64.34222        | soft  | highly protected and almost enclosed inner sandy bay | Beligica 120 Expedition 2019                                                          |
| Pleneau Island (just off penguin colony on SE corner)                    | -65.10425        | -64.04705        | hard  | Hard Rock Community                                  | American Gould Trip 2019                                                              |
| Pleneau Island                                                           | -65.10000        | -64.06667        | hard  | boulders and pebbles                                 | Lisa Trotter Dive Guide                                                               |
| Punta Gutierrez                                                          | -<br>65.08555556 | -<br>63.13888889 | soft  | soft                                                 | Carlos Angulo Spain                                                                   |

|                                 |                  |                  |       |                                                  |                                           |
|---------------------------------|------------------|------------------|-------|--------------------------------------------------|-------------------------------------------|
| Booth Island                    | -65.08333        | -64.00000        | hard  | rocky                                            | Lisa Trotter Dive Guide                   |
| Booth Island                    | -<br>65.07495556 | -<br>64.00599167 | mixed | Rocky with areas of Ice Scour and Soft Substrate | Lisa Kelly IAATO                          |
| Wauwermans Island #514          | -64.91668        | -64.03492        | hard  | hard rock                                        | Sabrina Heiser Alabama University         |
| Skontorp Cove, Paradise Harbour | -64.90528        | -63.08472        | soft  | highly protected inner cove with muddy bottoms   | Beligica 120 Expedition 2019              |
| Wauwermans Islands              | -64.90017        | -63.85313        | hard  | Hard Rock Community                              | American Gould Trip 2019                  |
| Paradise Bay, Shag Wall         | -64.89760        | -62.87250        | hard  | rock wall                                        | Ashley Knight and Peter Webster Nat Geo   |
| Paradise Bay, Shag Cliffs       | -64.89452        | -62.90429        | hard  | rock wall                                        | Ashley Knight and Peter Webster Nat Geo   |
| Paradise Bay, Under Bird Cliffs | -64.89442        | -62.87157        | hard  | rocky wall with gravel/silt on slopes            | Ashley Knight and Peter Webster Nat Geo   |
| Paradise Bay                    | -<br>64.88333333 | -<br>62.88333333 | hard  | hard bottom                                      | Ricardo Sahade Sedna sail ship dive sites |
| Peltier Channel                 | -<br>64.86493056 | -<br>63.51063611 | hard  | Rocky                                            | Lisa Kelly IAATO                          |
| Paradise Harbor                 | -64.85000        | -62.90000        | hard  | rocky                                            | Lisa Trotter Dive Guide                   |
| Neko Harbour                    | -64.84560        | -62.52880        | soft  | sand/fine silt                                   | Ashley Knight and Peter Webster Nat Geo   |
| Paradise Harbour                | -<br>64.84435556 | -<br>62.86737222 | mixed | Soft Substrate with Rocks Interspersed           | Lisa Kelly IAATO                          |
| Port Lockroy, Peltier channel   | -64.83002        | -63.49547        | mixed | rocky reef with silt on slopes                   | Ashley Knight and Peter Webster Nat Geo   |
| Port Lockroy, Jougla point      | -64.82790        | -63.49570        | soft  | silt                                             | Ashley Knight and Peter Webster Nat Geo   |
| Port Lockroy, GoPro Site - RIP  | -64.82738        | -63.49553        | mixed | Silty with rocky protrusions                     | Ashley Knight and Peter Webster Nat Geo   |

|                                        |              |              |       |                                |                                                                                       |
|----------------------------------------|--------------|--------------|-------|--------------------------------|---------------------------------------------------------------------------------------|
| Port Lockroy, Jougla Point             | -64.82710    | -63.49231    | soft  | silt                           | Ashley Knight and Peter Webster Nat Geo                                               |
| Port Lockroy, Portside Rocks           | -64.82710    | -63.49231    | Mixed | rocky reef with silt on slopes | Ashley Knight and Peter Webster Nat Geo                                               |
| Jougla Point, Swallow Whale Bones      | -64.82607    | -63.49225    | soft  | silt                           | Ashley Knight and Peter Webster Nat Geo                                               |
| Port Lockroy                           | -64.82588333 | -63.48757222 | mixed | Glacial Silt with Rocky slopes | Lisa Kelly IAATO                                                                      |
| Port Lockroy, Between Base and Glacier | -64.82550    | -63.48882    | soft  | very fine silt                 | Ashley Knight and Peter Webster Nat Geo                                               |
| Paradise Bay                           | -64.82398056 | -62.85893056 | hard  |                                | Silvia Murcia was Inach                                                               |
| Paradise Harbor                        | -64.82083    | -62.85500    | hard  | rock wall                      | Ashley Knight and Peter Webster Nat Geo                                               |
| Dobrowolski Island                     | -64.80835    | -63.30737    | hard  | Boulder Shores                 | Dkab sites from Barnes Arnold 2001 paper and I extracted coordinated from google maps |
| North Laggard Island Wall              | -64.80598    | -64.01578    | hard  | wall + hard rock               | Sabrina Heiser Alabama University                                                     |
| Limitrophe Island                      | -64.79320    | -64.00723    | hard  | Hard Rock Community            | American Gould Trip 2019                                                              |
| Limitrophe Island                      | -64.79277    | -64.99845    | hard  | hard rock                      | Sabrina Heiser Alabama University                                                     |
| Joubin Island #1 (Howard Island)       | -64.78830    | -64.36222    | hard  | hard rock                      | Sabrina Heiser Alabama University                                                     |
| Stepping Stones                        | -64.78378    | -63.99107    | hard  | hard rock                      | Sabrina Heiser Alabama University                                                     |
| Port Lockroy                           | -64.78333    | -64.10000    | hard  | rocky                          | Lisa Trotter Dive Guide                                                               |
| Bahia Paraiso                          | -64.78045    | -64.06250    | hard  | hard rock + ship wreck         | Sabrina Heiser Alabama University                                                     |

|                                             |           |              |       |                                                                                 |                                           |
|---------------------------------------------|-----------|--------------|-------|---------------------------------------------------------------------------------|-------------------------------------------|
| SE corner of Bonaparte Point, Anvers Island | -64.77927 | -64.04408    | hard  | Hard Rock Community                                                             | American Gould Trip 2019                  |
| SE Bonaparte Point                          | -64.77912 | -64.04190    | hard  | hard rock + occasionally sediment                                               | Sabrina Heiser Alabama University         |
| Anvers Island                               | -64.775   | -64.06666667 | mixed | mixed                                                                           | Ricardo Sahade Sedna sail ship dive sites |
| Palmer Pier                                 | -64.77458 | -64.05458    | hard  | hard rock + man made pier                                                       | Sabrina Heiser Alabama University         |
| Beaumont Skerries                           | -64.77448 | -64.30925    | hard  | wall                                                                            | Sabrina Heiser Alabama University         |
| Gamage Point                                | -64.77407 | -64.05665    | hard  | hard rock + some sediment at bottom                                             | Sabrina Heiser Alabama University         |
| Joubin Islands                              | -64.77195 | -64.36985    | hard  | Hard Rock Community                                                             | American Gould Trip 2019                  |
| East Litchfield Island                      | -64.76853 | -64.08385    | hard  | hard rock + some sediment at bottom                                             | Sabrina Heiser Alabama University         |
| Old Palmer                                  | -64.76522 | -64.07808    | hard  | hard rock                                                                       | Sabrina Heiser Alabama University         |
| Norsel Point                                | -64.76045 | -64.09833    | hard  | wall + hard rock                                                                | Sabrina Heiser Alabama University         |
| Useful Island                               | -64.75722 | -62.91083    | hard  | rocky shallows to muddy substrate with gravels at depth                         | Beligica 120 Expedition 2019              |
| Danco                                       | -64.74537 | -62.65826    |       | stunning rock wall (prob best dive site for me in Antarctica)                   | Gail Ashton Peninsula Dives               |
| Danco Island, Ronge Island                  | -64.74420 | -62.65535    | hard  | sheer wall dropping virtually to 50m - ROV footage nearby shows bouldery seabed | Ashley Knight and Peter Webster Nat Geo   |
| Green Reef. Neumayer Channel                | -64.73306 | -63.53722    | soft  | Soft sand, muddy                                                                | Beligica 120 Expedition 2019              |

|                                                   |                  |                  |       |                                                |                                           |
|---------------------------------------------------|------------------|------------------|-------|------------------------------------------------|-------------------------------------------|
| Casey Islands                                     | -64.72805        | -64.24857        | hard  | hard rock                                      | Sabrina Heiser Alabama University         |
| Dream Island                                      | -64.72397        | -64.22313        | hard  | hard rock                                      | Sabrina Heiser Alabama University         |
| Cuerville Island                                  | -64.68333        | -62.63333        | hard  | rocky                                          | Lisa Trotter Dive Guide                   |
| Cuerville Island East Wall                        | -<br>64.68313056 | -<br>62.61328056 | hard  | Rock Wall, Scoured to 10 M then rock with Kelp | Lisa Kelly IAATO                          |
| Cuerville, shallow spit                           | -64.68085        | -62.62058        | mixed | pebbly (~5-10cm)                               | Ashley Knight and Peter Webster Nat Geo   |
| Cuerville Wall                                    | -64.68010        | -62.61710        | hard  | rocky reef with gravel                         | Ashley Knight and Peter Webster Nat Geo   |
| Cueverville                                       | -64.67990        | -62.61853        | mixed | gravel                                         | Ashley Knight and Peter Webster Nat Geo   |
| Opposite Side of Orne Harbour                     | -<br>64.64852222 | -<br>62.56698056 | hard  | Ice Scoured, Shelving Wall                     | Lisa Kelly IAATO                          |
| Orne Harbour                                      | -<br>64.63286111 | -<br>62.54429167 | hard  | Wall                                           | Lisa Kelly IAATO                          |
| Enterprise Island, Governoren wreck               | -64.54070        | -61.99820        | mixed | silt surrounding wreck                         | Ashley Knight and Peter Webster Nat Geo   |
| Foyn Harbour, Enterprise Island, Governoren wreck | -64.54023        | -62.00135        | mixed | silt surrounding wreck                         | Ashley Knight and Peter Webster Nat Geo   |
| Portal Point, Lone rock near spit                 | -64.49740        | -61.76480        | hard  | ~30cm round rocks                              | Ashley Knight and Peter Webster Nat Geo   |
| Melchoir Island                                   | -<br>64.41111111 | -<br>62.87611111 | hard  | hard bottom                                    | Ricardo Sahade Sedna sail ship dive sites |
| Isla Musgo                                        | -<br>64.38694444 | -<br>61.21972222 | hard  | rock wall                                      | Carlos Angulo Spain                       |
| Melchior Island                                   | -64.38500        | -63.02083        | mixed | muddy bottom with gravels and dropstones       | Beligica 120 Expedition 2019              |

|                                |             |             |       |                                                   |                                           |
|--------------------------------|-------------|-------------|-------|---------------------------------------------------|-------------------------------------------|
| Cierva Cove                    | -64.15000   | -60.85500   | hard  | rocky/bouldery                                    | Ashley Knight and Peter Webster Nat Geo   |
| Hydruga Rocks                  | -64.13333   | -61.91667   | soft  | sand                                              | Lisa Trotter Dive Guide                   |
| Mikkelsen Harbor (D'Hainaut)   | 63.90542778 | 60.79363333 | hard  | Rocky with Kelp                                   | Lisa Kelly IAATO                          |
| Punta Sheppard Point           | -63.8775    | 56.98666667 | soft  | soft                                              | Carlos Angulo Spain                       |
| Aitcho Island, Barrientos      | -63.86843   | -60.97487   | hard  | rocky reef                                        | Ashley Knight and Peter Webster Nat Geo   |
| Spert Island                   | -63.86200   | -60.98580   | Hard  | surgey channel with rock walls, boulders and sand | Ashley Knight and Peter Webster Nat Geo   |
| Paulet Island                  | -63.58333   | -55.78333   | hard  | rocky                                             | Lisa Trotter Dive Guide                   |
| Paulet Island                  | 63.57400833 | 55.79905833 | mixed | Ice Scoured Pebbly Bottom                         | Lisa Kelly IAATO                          |
| Paulet Island                  | -63.57040   | -55.77430   | soft  | silt                                              | Ashley Knight and Peter Webster Nat Geo   |
| Paulet Island                  | -63.57040   | -55.77430   | hard  | round rocks ~30cm                                 | Ashley Knight and Peter Webster Nat Geo   |
| Paulet Island                  | 63.56891944 | 55.80741667 | mixed | Ice Scoured Pebbly Bottom                         | Lisa Kelly IAATO                          |
| Brown Bluff                    | 63.52153889 | -56.879025  | hard  | Iceberg Scour and Rocky Substrate                 | Lisa Kelly IAATO                          |
| Brown Bluff, Rock at South End | -63.51057   | -56.90540   | mixed | sand/gravel                                       | Ashley Knight and Peter Webster Nat Geo   |
| Brown Bluff                    | -63.51037   | -56.87507   | soft  | sand/fine silt                                    | Ashley Knight and Peter Webster Nat Geo   |
| Esperanza Bay                  | 63.41027778 | 56.99527778 | mixed | mixed                                             | Ricardo Sahade Sedna sail ship dive sites |
| Tay Head                       | 63.35260278 | 55.55168056 | hard  | Ice Scoured Rock                                  | Lisa Kelly IAATO                          |

|                                     |                  |                  |       |                                                                               |                                                                                       |
|-------------------------------------|------------------|------------------|-------|-------------------------------------------------------------------------------|---------------------------------------------------------------------------------------|
| Base O higgins                      | -<br>63.32053333 | -<br>57.89756667 | hard  |                                                                               | Silvia Murcia was Inach                                                               |
| BAE Gabriel de castilla             | -<br>63.12972222 | -<br>60.82777778 | soft  | soft                                                                          | Carlos Angulo Spain                                                                   |
| Deception Island, Neptune's Bellows | -62.99210        | -60.55155        | hard  | sheer cliffs/rock                                                             | Ashley Knight and Peter Webster Nat Geo                                               |
| Deception Island                    | -<br>62.99083056 | -<br>60.56027222 | hard  |                                                                               | Silvia Murcia was Inach                                                               |
| Deception Island, Whalers Bay       | -62.98990        | -60.55930        | Mixed | gravel/volcanic ash with sheer rock faces from 27m. *Site is inside a caldera | Ashley Knight and Peter Webster Nat Geo                                               |
| Deception Island Whaler's Bay       | -<br>62.98744444 | -<br>60.55296111 | hard  | Wall, Rocky with Kelp; plateaus with Volcanic Cinder.                         | Lisa Kelly IAATO                                                                      |
| Deception Island Whalers's Bay      | -<br>62.98336667 | -<br>60.56410833 | hard  | Volcanic cinder                                                               | Lisa Kelly IAATO                                                                      |
| Deception Island Port Foster        | -<br>62.95110278 | -<br>60.63736111 | hard  | Volcanic cinder                                                               | Lisa Kelly IAATO                                                                      |
| Deception Island                    | -<br>62.93527778 | -<br>60.60444444 | soft  | soft bottom                                                                   | Ricardo Sahade Sedna sail ship dive sites                                             |
| Deception Island                    | -<br>62.92406111 | -<br>60.67218333 | hard  |                                                                               | Silvia Murcia was Inach                                                               |
| Punta SW                            | -<br>62.83555556 | -<br>60.10638889 | hard  | hard                                                                          | Carlos Angulo Spain                                                                   |
| Rackelias rocks                     | -<br>62.79916667 | -<br>60.51666667 | soft  | soft                                                                          | Carlos Angulo Spain                                                                   |
| Snow Island                         | -62.74241        | -61.47604        | hard  | Boulder Shores                                                                | Dkab sites from Barnes Arnold 2001 paper and I extracted coordinated from google maps |

|                                    |                  |                  |       |                                                               |                                              |
|------------------------------------|------------------|------------------|-------|---------------------------------------------------------------|----------------------------------------------|
| Livingston Island                  | -<br>62.65888889 | -<br>60.36472222 | soft  | soft bottom                                                   | Ricardo Sahade Sedna sail ship<br>dive sites |
| Punta Hanna                        | -<br>62.65436111 | -60.61175        | hard  |                                                               | Silvia Murcia was Inach                      |
| Islote Albatros                    | -<br>62.65194444 | -<br>58.94638889 | hard  | hard                                                          | Carlos Angulo Spain                          |
| Neko Harbor                        | -62.59717        | -59.89167        | soft  | sand/fine silt                                                | Ashley Knight and Peter<br>Webster Nat Geo   |
| Punta NW                           | -<br>62.58388889 | -<br>59.96194444 | hard  | Rocky wall                                                    | Carlos Angulo Spain                          |
| Half Moon Island                   | -62.58210        | -59.91840        | mixed | rocky to around 15m then<br>gravel to fine sediment by<br>30m | Ashley Knight and Peter<br>Webster Nat Geo   |
| Arturo Base                        | -62.47105        | -<br>59.62871667 | hard  |                                                               | Silvia Murcia was Inach                      |
| Aitcho Islands                     | -62.41667        | -59.71667        | hard  | rocky                                                         | Lisa Trotter Dive Guide                      |
| Lemaire Channel, Barrientos Island | -62.41442        | -59.73480        | mixed | sand/gravel with rocky<br>reefs                               | Ashley Knight and Peter<br>Webster Nat Geo   |
| Barrientos                         | -62.41430        | -59.73460        | hard  | rocky reef                                                    | Ashley Knight and Peter<br>Webster Nat Geo   |
| Cecelia Island                     | -<br>62.41256111 | -<br>59.71913889 | hard  | Rocky Substrate with Kelp                                     | Lisa Kelly IAATO                             |
| Islotes E Artigas                  | -<br>62.26333333 | -<br>58.94444444 | hard  | hard                                                          | Carlos Angulo Spain                          |
| KGI                                | -<br>62.21983333 | -<br>58.78083333 | soft  |                                                               | Ahn (Korea) KGI                              |
| ZA-28                              | -62.21078        | -58.41977        | mixed | Mixed (mainly soft)                                           | Piotr Balazy (Poland DO)                     |
| KGI                                | -<br>62.21066667 | -<br>58.73916667 | soft  |                                                               | Ahn (Korea) KGI                              |

|       |                  |                  |       |                     |                          |
|-------|------------------|------------------|-------|---------------------|--------------------------|
| KGI   | -<br>62.20883333 | -58.7345         | soft  |                     | Ahn (Korea) KGI          |
| KGI   | -<br>62.20483333 | -<br>58.72383333 | soft  |                     | Ahn (Korea) KGI          |
| ZA-29 | -62.19755        | -58.42842        | mixed | Mixed (mainly soft) | Piotr Balazy (Poland DO) |
| ZA-6  | -62.18265        | -58.61058        | mixed | Mixed (mainly soft) | Piotr Balazy (Poland DO) |
| ZA-17 | -62.18120        | -58.58837        | mixed | Mixed (mainly soft) | Piotr Balazy (Poland DO) |
| ZA-4  | -62.18015        | -58.53433        | mixed | Mixed (mainly soft) | Piotr Balazy (Poland DO) |
| ZA-13 | -62.17802        | -58.53385        | mixed | Mixed (mainly soft) | Piotr Balazy (Poland DO) |
| ZA-5  | -62.17712        | -58.54568        | mixed | Mixed (mainly soft) | Piotr Balazy (Poland DO) |
| ZA-14 | -62.17415        | -58.62298        | mixed | Mixed (mainly soft) | Piotr Balazy (Poland DO) |
| ZA-3  | -62.17007        | -58.51725        | mixed | Mixed (mainly soft) | Piotr Balazy (Poland DO) |
| ZA-23 | -62.16883        | -58.56025        | mixed | Mixed (mainly soft) | Piotr Balazy (Poland DO) |
| ZA-18 | -62.16702        | -58.54493        | mixed | Mixed (mainly soft) | Piotr Balazy (Poland DO) |
| ZA-33 | -62.16673        | -58.44010        | hard  | Rock                | Piotr Balazy (Poland DO) |
| ZA-15 | -62.16458        | -58.56385        | mixed | Mixed (mainly soft) | Piotr Balazy (Poland DO) |
| ZA-32 | -62.16450        | -58.56115        | mixed | Mixed (mainly soft) | Piotr Balazy (Poland DO) |
| ZA-22 | -62.16422        | -58.55337        | mixed | Mixed (mainly soft) | Piotr Balazy (Poland DO) |
| ZA-10 | -62.16418        | -58.55122        | mixed | Mixed (mainly soft) | Piotr Balazy (Poland DO) |
| ZA-19 | -62.16253        | -58.50208        | mixed | Mixed (mainly soft) | Piotr Balazy (Poland DO) |
| ZA-12 | -62.16060        | -58.59377        | mixed | Mixed (mainly soft) | Piotr Balazy (Poland DO) |
| ZA-7  | -62.15992        | -58.59167        | mixed | Mixed (mainly soft) | Piotr Balazy (Poland DO) |
| ZA-11 | -62.15867        | -58.59752        | mixed | Mixed (mainly soft) | Piotr Balazy (Poland DO) |
| ZA-1  | -62.15827        | -58.45868        | mixed | Mixed (mainly soft) | Piotr Balazy (Poland DO) |
| ZA-16 | -62.15480        | -58.55257        | mixed | Mixed (mainly soft) | Piotr Balazy (Poland DO) |
| ZA-8  | -62.15377        | -58.54560        | mixed | Mixed (mainly soft) | Piotr Balazy (Poland DO) |
| ZA-9  | -62.15315        | -58.54143        | mixed | Mixed (mainly soft) | Piotr Balazy (Poland DO) |
| ZA-20 | -62.14872        | -58.52710        | mixed | Mixed (mainly soft) | Piotr Balazy (Poland DO) |

|                     |           |           |       |                                            |                                      |
|---------------------|-----------|-----------|-------|--------------------------------------------|--------------------------------------|
| ZA-2                | -62.14150 | -58.50748 | mixed | Mixed (mainly soft)                        | Piotr Balazy (Poland DO)             |
| ZA-21               | -62.14100 | -58.50397 | hard  | Rock                                       | Piotr Balazy (Poland DO)             |
| ZA-31               | -62.12532 | -58.39678 | mixed | Mixed (mainly soft)                        | Piotr Balazy (Poland DO)             |
| ZA-30               | -62.11705 | -58.39475 | mixed | Mixed (mainly soft)                        | Piotr Balazy (Poland DO)             |
| Mackellar Fjord KGI | -62.10450 | -58.45860 | hard  | Hard (cobbles)                             | Video footage of the sites available |
| Martel Inlet KGI    | -62.10040 | -58.33260 | mixed | Mixed (mainly soft)                        | Video footage of the sites available |
| Martel Inlet KGI    | -62.10000 | -58.33120 | hard  | Hard (boulders, cobbles)                   | Video footage of the sites available |
| Martel Inlet KGI    | -62.09800 | -58.32970 | hard  | Hard (boulders, cobbles and pebbles)       | Video footage of the sites available |
| Martel Inlet KGI    | -62.09680 | -58.33230 | mixed | Mixed (mainly soft)                        | Video footage of the sites available |
| Mackellar Fjord KGI | -62.09240 | -58.41040 | hard  | Hard (cobbles)                             | Video footage of the sites available |
| ZA-24               | -62.09133 | -58.48763 | mixed | Mixed (mainly soft)                        | Piotr Balazy (Poland DO)             |
| Mackellar Fjord KGI | -62.09090 | -58.46520 | hard  | Hard (cobbles and boulders), no slope      | Video footage of the sites available |
| Mackellar Fjord KGI | -62.09060 | -58.47300 | hard  | Hard (boulders, cobbles), pronounced slope | Video footage of the sites available |
| Mackellar Fjord KGI | -62.08980 | -58.45160 | mixed | Mixed                                      | Video footage of the sites available |
| Mackellar Fjord KGI | -62.08050 | -58.46350 | mixed | Mixed                                      | Video footage of the sites available |
| ZA-25               | -62.07958 | -58.42727 | mixed | Mixed (mainly soft)                        | Piotr Balazy (Poland DO)             |
| Mackellar Fjord KGI | -62.07780 | -58.46030 | mixed | Mixed                                      | Video footage of the sites available |
| ZA-26               | -62.07600 | -58.35560 | mixed | Mixed (mainly soft)                        | Piotr Balazy (Poland DO)             |

|                                                                    |             |             |       |                                    |                                         |
|--------------------------------------------------------------------|-------------|-------------|-------|------------------------------------|-----------------------------------------|
| ZA-27                                                              | -62.07287   | -58.39460   | mixed | Mixed (mainly soft)                | Piotr Balazy (Poland DO)                |
| South Shetlands, Point Wild, Elephant Island, Inside wall of point | -61.09610   | -54.85950   | mixed | gravel/sand between rocky outcrops | Ashley Knight and Peter Webster Nat Geo |
| Anchor. D Plates                                                   | -67.5931166 | -68.1897333 | hard  |                                    |                                         |
| Cheshire Island                                                    | -67.5733833 | -68.1255    | hard  |                                    |                                         |
| East Beach                                                         | -67.5695833 | -68.11335   | mixed |                                    |                                         |
| Back Bay Lagoon                                                    | -67.5952666 | -68.2532833 | mixed |                                    |                                         |
| Rose Garden                                                        | -67.6118833 | -68.2094833 | hard  |                                    |                                         |
| Leonie Island                                                      | -67.6049333 | -68.3209833 | hard  |                                    |                                         |
| Mackay Dive                                                        | -67.5363665 | -68.07235   | hard  |                                    |                                         |
| Shack's Crack                                                      | -67.5545833 | -68.1971833 | hard  |                                    |                                         |
| Trolval                                                            | -67.5954666 | -68.2100333 | hard  |                                    |                                         |
| Temporary Jetty                                                    | -67.5688    | -68.1301165 | mixed |                                    |                                         |
| - Wharf 2019                                                       | -67.57195   | -68.1297166 | hard  |                                    |                                         |
| Mackay Point                                                       | -67.5388833 | -68.0758    | hard  |                                    |                                         |
| Killingbeck 1                                                      | -67.5712333 | -68.0691666 | hard  |                                    |                                         |
| Lagoon                                                             | -67.5938666 | -68.24245   | mixed |                                    |                                         |
| Leonie NE                                                          | -67.5925    | -68.33975   | hard  |                                    |                                         |
| Killingbeck 2                                                      | -67.5720333 | -68.0712833 | hard  |                                    |                                         |
| Killingbeck 3                                                      | -67.5733666 | -68.0756    | hard  |                                    |                                         |
| S Cove Logger                                                      | -67.5708666 | -68.1327333 | hard  |                                    |                                         |
| Sediment C 20m                                                     | -67.5692166 | -68.1340833 | soft  |                                    |                                         |
| T1 5m                                                              | -67.5702666 | -68.13245   | hard  |                                    |                                         |
| Killingbeck                                                        | -67.5756333 | -68.1059666 | hard  |                                    | HAZ025                                  |
| Killingbeck                                                        | -67.5708333 | -68.0924    | hard  |                                    | HAZ021                                  |
| Killingbeck                                                        | -67.5749833 | -68.08275   | hard  |                                    | HAZ030                                  |
| Killingbeck                                                        | -67.5797166 | -68.0836999 | hard  |                                    | HAZ036                                  |
| Killingbeck                                                        | -67.5757666 | -68.0989666 | hard  |                                    | HAZ027                                  |

|                   |             |             |      |  |        |
|-------------------|-------------|-------------|------|--|--------|
| Macay Point       | -67.5386166 | -68.0651166 | hard |  | HAZ008 |
| Leonie Pinnacle 1 | -67.5846166 | -68.3446666 | hard |  | HAZ046 |
| Leonie Pinnacle 2 | -67.5793    | -68.3151    | hard |  | HAZ005 |
| HAZ044            | -67.61335   | -68.3248166 | hard |  |        |
| Kirsty Brown      | -67.5968333 | -68.2630833 | hard |  |        |
| Donnelly          | -67.61055   | -68.2027666 | hard |  |        |
| Hangar Cove       | -67.564278  | -68.127347  | soft |  |        |
| North Cove        | -67.566071  | -68.120758  | soft |  |        |

Table S3. General Linear Model (Minitab 19) the relationship between the number of functional groups and carbon standing stock.

| Factor                                 | Type  | Levels | Values            |           |           |
|----------------------------------------|-------|--------|-------------------|-----------|-----------|
| Cove                                   | Fixed | 2      | Hangar, South     |           |           |
| Substrata                              | Fixed | 2      | rocky, soft       |           |           |
| Season                                 | Fixed | 2      | summer,<br>winter |           |           |
|                                        |       |        |                   |           |           |
| Analysis of variance                   |       |        |                   |           |           |
| Source                                 | DF    | Adj SS | Adj MS            | F - Value | P - Value |
| Log(10) Functional Groups              | 1     | 0.30   | 0.30              | 6.28      | 0.02      |
| Log(10) Functional Groups <sup>2</sup> | 1     | 0.58   | 0.58              | 11.96     | <0.01     |
| Cove                                   | 1     | 1.58   | 1.58              | 32.49     | <0.01     |
| Substrata                              | 1     | 4.68   | 4.68              | 96.34     | <0.01     |
| Season                                 | 1     | 0.02   | 0.02              | 0.34      | 0.56      |
| Error                                  | 69    | 3.35   | 0.05              |           |           |
| Total                                  | 74    | 12.27  |                   |           |           |
